# Supplementary material for: A meta-analysis study of the robustness and universality of gut microbiome-metabolome associations
Source: PubMed Central journal article supplement (PMC8507343; doi:10.1186/s40168-021-01149-z), 2021-10-12
Supplement: 40168_2021_1149_MOESM3_ESM.pdf [file 40168_2021_1149_MOESM3_ESM.pdf]

## 1 Supplementary Notes

### 2 Supplementary note 1: Alternative machine learning pipelines and effect on results

3 In order to find a machine learning pipeline that best fits our multi-study data, we examined several  
4 different pipelines, and eventually chose the one that produced the highest number of well-predicted  
5 metabolites overall among the healthy datasets.

6 Specifically, we tried both random forest (RF) and elastic net models (ENet), from the “ranger” [1] and  
7 “glmnet” [2] packages, respectively. For each algorithm, we additionally tried both a pipeline that  
8 included model tuning via grid search and a pipeline that did not include tuning and used default  
9 hyperparameters instead. For the tuned pipeline, we used nested cross-validation (CV), meaning that  
10 an outer 10-fold CV loop was used for estimating the overall model performance, and an inner 10-fold  
11 CV loop was used to find hyperparameters that optimize the root mean square error (RMSE). The  
12 hyperparameters we tuned for RF were *mtry* (number of features per tree), *trees* (number of trees),  
13 and *min\_n* (minimal number of samples in a tree node). For ENet, we tuned *mixture* (proportion of L1  
14 regularization in the model) and *penalty* (total amount of regularization in the model) hyperparameters.  
15 Each pipeline produced qualitatively similar results in terms of which metabolites were most  
16 predictable but some differed in the final set of well-predicted metabolites given our strict cutoff  
17 (Additional file 3: Figure S8). Overall, the RF models performed better on our data than the ENet ones,  
18 with highly similar results between the pipeline version with tuning and that without tuning (Additional  
19 file 3: Figure S8). The RF-without-tuning yielded 418 well-predicted metabolites out of 1255 models  
20 (accumulating over all datasets), and the RF-with-tuning, ENet-with-tuning, and ENet-without-tuning  
21 yielded 407, 323, and 241 well-predicted metabolites, respectively.

22 We ran each regression task (a specific metabolite in a specific dataset) 5 times to also examine the  
23 stability of each pipeline, given the randomness introduced by the models. All pipelines were similarly  
24 stable, as quantified by the percent of metabolites that were either always well-predicted or never well-  
25 predicted across the 5 runs. Specifically, all pipelines resulted in 83%-86% metabolites being always or  
26 never well-predicted, and 92%-95% if also allowing 1 of the 5 runs to disagree with the others.

27 The pipeline that resulted in most well-predicted metabolites overall was the one without  
28 hyperparameter tuning using RF with default hyperparameters and was thus selected for further  
29 analysis.

30

## 31 Supplementary note 2: Comparisons to previous studies and validation

32 As a validation of our machine learning pipeline, we compared the predictability of metabolites  
33 obtained using our pipeline in one specific dataset to results from a recent study that applied a  
34 somewhat different machine learning pipeline to the same dataset. In this study (Mallick *et al.* [3]), a  
35 machine learning method, termed *MelonnPan*, was used for predicting metabolite levels based on  
36 functional profiles of the microbiome. Mallick *et al.* used a dataset of IBD patients and controls to train  
37 and tune the models, and another independent cohort to evaluate performance and determine which  
38 metabolites can be well-predicted (using a similar threshold to the one used in our study). The  
39 combined dataset from that study is also included in our meta-analysis and is labeled as  
40 'FRANZOSA\_IBD'. Importantly, while both *MelonnPan* and our study use a machine learning-based  
41 framework, a few important differences should be acknowledged. First, Mallick *et al.* trained the model  
42 on a mix of IBD and control subjects from the training set, while in our study we considered both the  
43 training and validation cohorts but *only* the healthy subjects. Second, Mallick *et al.* used gene-family  
44 relative abundances as features, whereas our study used genera relative abundances. Yet, even when  
45 considering these methodological differences, since both studies ultimately aimed to predict  
46 metabolite levels based on microbiome composition, we expected a significant overlap. To compare  
47 our results with those reported in Mallick *et al.*, we obtained the list of 107 well-predicted metabolites  
48 from that study's supplementary data, and mapped metabolite names to HMDB IDs using  
49 MetaboAnalyst [4]. Out of these 107 metabolites, 98 were mapped to HMDB IDs, of which 81 were also  
50 included in our analysis. We found that 60 metabolites (74%) of these 81 were also well-predicted by  
51 our pipeline in this dataset (Additional file 3: Figure S3A). Interestingly, 20 of the 21 metabolites well-  
52 predicted in Mallick *et al.* but not well-predicted by our pipeline, were also significantly associated with  
53 IBD (each metabolite tested independently using a Mann-Whitney test, with FDR-corrected P value <  
54 0.05), suggesting that the disease status may have amplified the predictability of these metabolites  
55 when training the machine learning models on mixed case-control datasets.

56 Finally, to also provide additional support to our final set of *robustly* well-predicted metabolites, we  
57 compared this set to findings from an independent analysis [5] of paired stool microbiome-metabolome  
58 profiles from the TwinsUK cohort [6] – the largest cohort with such data published to date (not included  
59 in our meta-analysis due to limited data availability). As part of this analysis, the authors have estimated  
60 the proportion of variance in each detected metabolite explained by the composition of the microbiota,  
61 by regressing fecal metabolite concentrations against the microbial UniFrac beta-diversity. Since we  
62 believe that our set of *robustly* well-predicted metabolites captures consistent, robust, and  
63 reproducible associations between the microbiome and specific metabolites, we expected this set to  
64 show some agreement with microbiome-metabolite associations detected by a completely different

65 statistical framework and in a new, independent dataset. Indeed, obtaining the calculated estimations  
66 of explained variance from this study, we found that robustly well-predicted metabolites were  
67 associated with significantly higher proportions of variance explained compared to metabolites not in  
68 this set (Mann-Whitney  $P = 0.0008$ , Additional file 3: Figure S3B).

69

### 70 [Supplementary note 3: Metabolic pathways-oriented analysis of robustly well-predicted metabolites](#)

71 Among robustly well-predicted metabolites, we found multiple metabolites that take part in clinically  
72 important pathways known to involve the gut microbiome, such as bile acid transformations,  
73 trimethylamine N-oxide (TMAO) metabolism, tryptophan metabolism, and polyamine biosynthesis.  
74 Here, we elaborate on several of these metabolic pathways, highlighting which related metabolites  
75 were robustly associated with the microbiome and how these findings coincide with existing literature.

76 Bile acids have an essential role in fat digestion but also act systematically as hormones, regulating both  
77 glucose and fatty acids levels and immune homeostasis [7]. Our analysis echoes the microbiota's known  
78 essential role in the transformation of primary bile acids to secondary bile acids [7]. Specifically, we  
79 found that the levels of the primary bile acids cholic acid (HMDB0000619), chenodeoxycholic acid  
80 (HMDB0000518), glycochenodeoxycholate (HMDB0000637) taurocholic acid (HMDB0000036),  
81 taurodeoxycholic acid (HMDB0000896), lithocholyltaurine (HMDB0000722), and  
82 taurochenodeoxycholate (HMDB0000951), as well as secondary bile acids such as lithocholic acid  
83 (HMDB0000761), were all robustlywell-predicted by the microbiota's composition. We additionally  
84 found that the *Blautia* genus consistently contributes to cholic acid models (Additional file 1: Table S8).  
85 Indeed, previously reported genomic analysis revealed that strains of this genus contain bile acid  
86 hydrolysis enzymes [7]. This finding is also supported by rodent models: Mice that were fed cholic acid  
87 showed a drastic increase in *Blautia* abundance [8]. Additional major bile components were robustly  
88 well-predicted, including cholesterol (HMDB0000067), taurine (HMDB0000251, a deconjugation  
89 product of the primary bile acid taurochenodesoxycholate), and urobilin (the oxidized form of  
90 urobilinogen, a product of microbial metabolism of bile pigment) (see Figure 3C). Contributors analysis  
91 indicated that *Bacteroides* played a consistent role in cholesterol models, consistent with previous  
92 reports [9, 10]. Our analyses also indicated that the *Bilophila* genus is consistently associated with  
93 Taurine, again in agreement with experimental results [11, 12].

94 TMAO metabolism by both the host and gut bacteria has been widely studied for its involvement in  
95 atherosclerosis development. Specifically, dietary choline and L-carnitine are metabolized by intestinal  
96 bacteria to produce TMA, which, in turn, is further oxidized into TMAO in the liver and absorbed into  
97 the bloodstream [13, 14]. Two metabolites involved in this process were found to be robustly well-

98 predicted, namely N6, N6, N6-Trimethyl-L-lysine (HMDB0001325), and gamma-butyrobetaine  
99 (HMDB0001161, an intermediate in gut microbe-dependent formation of TMA from L-carnitine) [14,  
100 15]. TMAO itself was included in our analysis but was not robustly well-predicted, perhaps  
101 unsurprisingly as the majority of TMAO is extracted in urine and only a small fraction (~4%) is extracted  
102 in feces [16]. This most likely indicates that TMAO extraction in the stool is affected more by inter-  
103 personal physiological variation rather than differences in microbial activity in the gut.

104 Perhaps one of the most well-studied classes of microbially-governed metabolites is short chain fatty  
105 acids (SCFA). SCFAs have been shown to influence a wide spectrum of physiological processes, ranging  
106 from gut-brain axis crosstalk to immunomodulation [17]. However, quantification of SCFAs in common  
107 untargeted MS methods is challenging due to their high volatility [18]. As a result, most of the SCFAs  
108 are missing from our analysis, and only butyric acid was found to be robustly well-predicted.

109 Our analysis also supports the established microbial involvement in tryptophan metabolism [19].  
110 Tryptophan itself as well as its derivatives, tryptamine and indolepropionate were all robustly well-  
111 predicted (see Additional file 3: Figure S3B). These two derivatives are known agonists of the aryl  
112 hydrocarbon receptor, an important transcription factor that mediates xenobiotic degradation and  
113 immune response [20, 21]. Our analysis found that members of the *Odoribacter* genus consistently  
114 contributed to tryptophan models, in line with evidence of *Odoribacter Splanchnicus's* (isolated from  
115 human stool) ability to metabolize tryptophan [22].

116 Polyamines are ubiquitous to all living cells and possess a wide set of biological functions including gene  
117 regulation, resistance to oxidative stress, and cell proliferation and differentiation [23]. In certain  
118 cancers, polyamine metabolism is dysregulated, and several recent and ongoing clinical trials are testing  
119 agents targeting polyamines for both therapy and prevention of cancer [24]. The colonic bacterial  
120 population is known to directly contribute to shifts in polyamine metabolism (and therefore to  
121 carcinogenesis), and indeed levels of several polyamines and related metabolites in the stool were  
122 consistently associated with the microbiome in our analysis, including N1,N12-diacetylspermine  
123 (HMDB0002172), putrescine (HMDB0001414), N-acetylputrescine (HMDB0002064), S-  
124 adenosylmethionine (HMDB0001185), cadaverine (HMDB0002322) N1-acetylspermidine  
125 (HMDB0001276), and N1-acetylspermine (HMDB0001186) [23, 25] (see Additional file 3: Figure S3C).  
126 The *Alistipes* genus was a consistent contributor to all robustly well-predicted polyamines. Indeed, this  
127 bacteria was found to possess enzymes in the polyamines metabolic pathway [26].

128 Two robustly well-predicted metabolites, namely gamma-aminobutyric acid (GABA, HMDB0000112)  
129 and N-acetyl-L-aspartic acid (HMDB0000812), also illustrated the suggested role of the microbiome in  
130 the gut-brain axis. GABA is an important neurotransmitter that was found to be metabolized by

131 Bacteroides strains [27]. N-acetyl-L-aspartic acid is the most abundant amino acid in brain tissue and is  
132 a key osmolyte and precursor for the neurotransmitter N-acetylaspartylglutamate [28].

133 Our results additionally support more recent findings such as multiple commensal gut bacteria's role in  
134 L-proline biosynthesis, discovered using protein similarity networks [29], specifically by acting on 4-  
135 hydroxyproline (HMDB000025) which was robustly well-predicted in our analysis. 4-hydroxyproline can  
136 also be obtained through diet and carries health benefits [30].

137 Lastly, we note the class of polyunsaturated fatty acids (PUFA). PUFAs, and specifically omega-3 and  
138 omega-6 acids, all have a key role in regulating the homeostasis of the immune system, lipid  
139 metabolism, and inflammatory reaction and have an important role in cancer development, food  
140 allergies, and cardiovascular diseases [31]. Our analysis highlights the microbial role in the metabolism  
141 of PUFAs, including many omega-6 derivatives such as dihomo-gamma-linolenic acid (HMDB0002925),  
142 arachidonic acid (HMDB0001043), adrenic acid (also named docosatetraenoic acid, HMDB0002226),  
143 docosapentaenoic acid (22n-6) (HMDB0001976), 9,10-DHOME (HMDB0004704) and 12,13-DHOME  
144 (HMDB0004705). The analysis further indicates the association of gut microbes and the omega-3 acids  
145 eicosapentaenoic acid (HMDB0001999) and Docosahexaenoic acid (HMDB0002183). These PUFA-  
146 microbiota associations are supported by previous experimental findings, as metabolism of PUFAs was  
147 detected in cultured human intestinal bacteria [32]. In addition, experiments in specific pathogen-free  
148 mice compared to germ-free mice have established the role of mice gastrointestinal bacteria in  
149 modifying the fatty acid profiles of their hosts, in particular by increasing the levels of intermediates of  
150 polyunsaturated fatty acid-saturation metabolism [33]. Bacteroides genus was a consistent contributor  
151 to both docosapentaenoic acid (22n-6) and dihomo-gamma-linolenic acid models. This finding is  
152 supported by experiments in piglets, where piglets fed with omega 3 rich oils exhibited growth in cecum  
153 Bacteroides population compared to piglets fed with omega-6 rich oils [34].

154

#### 155 [Supplementary note 4: Effect of excluding the infants dataset on robustness results](#)

156 While multiple sources of heterogeneity exist between the datasets included in this meta-analysis study  
157 (as discussed in the main text), the difference between infants' and adults' microbiomes may constitute  
158 one of the most prominent heterogeneity source. Specifically, the infant gut differs substantially from  
159 that of adults in both digestion, absorption, and motility [35, 36]. Moreover, microbial composition and  
160 metabolic activity in the gut changes dramatically over the first years of life [35, 37]. We therefore  
161 conducted an additional analysis in which we excluded the infants' dataset included in our study  
162 (HE\_INFANTS or HE in short), and report results below.

163 Out of 940 unique, non-rare, HMDB compound IDs found across the 8 healthy datasets (compared to  
164 951 when including HE), 264 (28%) were shared among 3 or more datasets. Training a predictor for  
165 each of the 264 metabolites and in each dataset it appeared in resulted in a total of 1161 metabolite  
166 predictor models. Of these, 401 models were able to successfully predict the metabolite level (with  $\rho$   
167  $> 0.3$  and FDR  $< 0.1$ ), and accordingly defined as well-predicted.

168 Using random-effects models and following the strategy and thresholds applied when analyzing the  
169 complete set of datasets, we found 97 robustly well-predicted metabolites, mostly overlapping with  
170 the 97 found when including HE\_INFANTS dataset. Specifically, 93 of the robustly well-predicted  
171 metabolites remained so when excluding HE. Four metabolites that were found to be robustly well-  
172 predicted when excluding the HE dataset and were not robustly well-predicted when the HE dataset  
173 was included were L-alpha-Aminobutyric acid (HMDB0000452), L-Methionine (HMDB0000696), D-  
174 Xylose (HMDB0000098), and 3-Hydroxybutyric acid (HMDB0000011). For all of these metabolites, the  
175 performance of the microbiome-based models in the HE dataset was poor (Spearman correlation  $< 0.16$   
176 and FDR-corrected p value  $> 0.4$ ), and thus, when excluding HE from the corresponding random-effects  
177 models, the overall mean predictability was higher and exceeded the defined cutoff for robustness. The  
178 four metabolites that were no longer robustly well-predicted after excluding HE were 2-Hydroxy-3-  
179 methylbutyric acid (HMDB0000407), gamma-Aminobutyric acid (HMDB0000112), L-Arabinose  
180 (HMDB0000646), and Creatine (HMDB0000064). The first 3 simply no longer appeared in 3 datasets  
181 and were therefor not included in the random-effects models analysis. Creatine did appear in enough  
182 datasets but without HE the overall predictability estimate dropped below our threshold. Though some  
183 of these metabolites may indeed interact differently with the microbiome in the infant gut compared  
184 to the adult gut, more infant datasets are required in order to more rigorously determine such  
185 differences.

## 186 References

- 187 1. Wright MN, Ziegler A. ranger: A Fast Implementation of Random Forests for High Dimensional Data in C++ and  
188 R. *J Stat Softw.* 2015;77. doi:10.18637/jss.v077.i01.
- 189 2. Friedman J, Hastie T, Tibshirani R. Regularization paths for generalized linear models via coordinate descent. *J*  
190 *Stat Softw.* 2010;33:1–22. doi:10.18637/jss.v033.i01.
- 191 3. Mallick H, Franzosa EA, McIver LJ, Banerjee S, Sirota-Madi A, Kostic AD, et al. Predictive metabolomic profiling  
192 of microbial communities using amplicon or metagenomic sequences. *Nat Commun.* 2019;10:3136.  
193 doi:10.1038/s41467-019-10927-1.
- 194 4. Chong J, Soufan O, Li C, Caraus I, Li S, Bourque G, et al. MetaboAnalyst 4.0: towards more transparent and  
195 integrative metabolomics analysis | *Nucleic Acids Research* | Oxford Academic. *Nucleic Acids Res.*  
196 2018;46:W486–94. <https://academic.oup.com/nar/article/46/W1/W486/4995686>. Accessed 4 Aug 2020.
- 197 5. Zierer J, Jackson MA, Kastenmüller G, Mangino M, Long T, Telenti A, et al. The fecal metabolome as a  
198 functional readout of the gut microbiome. *Nat Genet.* 2018;50:790–5. doi:10.1038/s41588-018-0135-7.
- 199 6. Spector TD, Williams FMK. The UK Adult Twin Registry (TwinsUK). *Twin Res Hum Genet.* 2006;9:899–906.
- 200 7. Molinero N, Ruiz L, Sánchez B, Margolles A, Delgado S. Intestinal Bacteria Interplay With Bile and Cholesterol  
201 Metabolism: Implications on Host Physiology. *Front Physiol.* 2019;10 MAR:185. doi:10.3389/fphys.2019.00185.
- 202 8. Islam KBMS, Fukiya S, Hagio M, Fujii N, Ishizuka S, Ooka T, et al. Bile acid is a host factor that regulates the  
203 composition of the cecal microbiota in rats. *Gastroenterology.* 2011;141:1773–81.
- 204 9. Gérard P, Lepercq P, Leclerc M, Gavini F, Raibaud P, Juste C. *Bacteroides* sp. strain D8, the first cholesterol-  
205 reducing bacterium isolated from human feces. *Appl Environ Microbiol.* 2007;73:5742–9.  
206 doi:10.1128/AEM.02806-06.
- 207 10. Kriaa A, Bourgin M, Potiron A, Mkaouar H, Jablaoui A, Gérard P, et al. Microbial impact on cholesterol and  
208 bile acid metabolism: current status and future prospects. *Journal of Lipid Research.* 2019;60:323–32.  
209 doi:10.1194/jlr.R088989.
- 210 11. Laue H, Friedrich M, Ruff J, Cook AM. Dissimilatory sulfite reductase (Desulfoviridin) of the taurine-  
211 degrading, non-sulfate-reducing bacterium *Bilophila wadsworthia* RZATAU contains a fused DsrB-DsrD subunit. *J*  
212 *Bacteriol.* 2001;183:1727–33. doi:10.1128/JB.183.5.1727-1733.2001.
- 213 12. Laue H, Denger K, Cook AM. Taurine reduction in anaerobic respiration of *Bilophila wadsworthia* RZATAU.  
214 *Appl Environ Microbiol.* 1997;63.
- 215 13. Wang Z, Klipfell E, Bennett BJ, Koeth R, Levison BS, Dugar B, et al. Gut flora metabolism of  
216 phosphatidylcholine promotes cardiovascular disease. *Nature.* 2011;472:57–65. doi:10.1038/nature09922.
- 217 14. Koeth RA, Wang Z, Levison BS, Buffa JA, Org E, Sheehy BT, et al. Intestinal microbiota metabolism of l-  
218 carnitine, a nutrient in red meat, promotes atherosclerosis. *Nat Med.* 2013;19:576–85.

- 219 15. Rebouche CJ, Seim H. Carnitine metabolism and its regulation in microorganisms and mammals. *Annu Rev*  
220 *Nutr.* 1998;18:39–61.
- 221 16. Zeisel SH, Warriar M. Trimethylamine N-Oxide, the Microbiome, and Heart and Kidney Disease. *Annu Rev*  
222 *Nutr.* 2017;37:157–81.
- 223 17. Dalile B, Van Oudenhove L, Vervliet B, Verbeke K. The role of short-chain fatty acids in microbiota–gut–brain  
224 communication. *Nat Rev Gastroenterol Hepatol.* 2019;16:461–78. doi:10.1038/s41575-019-0157-3.
- 225 18. Li M, Zhu R, Song X, Wang Z, Weng H, Liang J. A sensitive method for the quantification of short-chain fatty  
226 acids by benzyl chloroformate derivatization combined with GC-MS. *Analyst.* 2020;145:2692–700.
- 227 19. Ma N, Ma X. Dietary Amino Acids and the Gut-Microbiome-Immune Axis: Physiological Metabolism and  
228 Therapeutic Prospects. *Compr Rev Food Sci Food Saf.* 2019;18:221–42.
- 229 20. Cheng Y, Jin UH, Allred CD, Jayaraman A, Chapkin RS, Safe S. Aryl hydrocarbon receptor activity of  
230 tryptophan metabolites in young adult mouse colonocytes. *Drug Metab Dispos.* 2015;43:1536–43.
- 231 21. Quintana FJ, Sherr DH. Aryl hydrocarbon receptor control of adaptive immunity. *Pharmacol Rev.*  
232 2013;65:1148–61.
- 233 22. Göker M, Gronow S, Zeytun A, Nolan M, Lucas S, Lapidus A, et al. Complete genome sequence of  
234 *odoribacter splanchnicus* type strain (1651/6 T). *Stand Genomic Sci.* 2011;4:200–9. doi:10.4056/sigs.1714269.
- 235 23. Tofalo R, Cocchi S, Suzzi G. Polyamines and Gut Microbiota. *Front Nutr.* 2019;6:16.  
236 doi:10.3389/fnut.2019.00016.
- 237 24. Casero RA, Murray Stewart T, Pegg AE. Polyamine metabolism and cancer: treatments, challenges  
238 and opportunities. *Nat Rev Cancer.* 2018;18:681–95. doi:10.1038/s41568-018-0050-3.
- 239 25. Matsumoto M, Benno Y. The Relationship between Microbiota and Polyamine Concentration in the Human  
240 Intestine: A Pilot Study. *Microbiol Immunol.* 2007;51:25–35. doi:10.1111/j.1348-0421.2007.tb03887.x.
- 241 26. Lei M, Menon R, Manteiga S, Alden N, Hunt C, Alaniz RC, et al. Environmental Chemical Diethylhexyl  
242 Phthalate Alters Intestinal Microbiota Community Structure and Metabolite Profile in Mice. *mSystems.* 2019;4.  
243 doi:10.1128/msystems.00724-19.
- 244 27. Strandwitz P, Kim KH, Terekhova D, Liu JK, Sharma A, Levering J, et al. GABA-modulating bacteria of the  
245 human gut microbiota. *Nat Microbiol.* 2019;4:396–403. doi:10.1038/s41564-018-0307-3.
- 246 28. Baslow MH. Functions of N-acetyl-L-aspartate and N-acetyl-L-aspartylglutamate in the vertebrate brain: Role  
247 in glial cell-specific signaling. *J Neurochem.* 2000;75:453–9.
- 248 29. Levin BJ, Huang YY, Peck SC, Wei Y, Martínez-Del Campo A, Marks JA, et al. A prominent glycy radical  
249 enzyme in human gut microbiomes metabolizes trans-4-hydroxy-L-proline. *Science.* 2017;355.
- 250 30. Wu G. Important roles of dietary taurine, creatine, carnosine, anserine and 4-hydroxyproline in human  
251 nutrition and health. *Amino Acids.* 2020;52:329–60. doi:10.1007/s00726-020-02823-6.



- 252 31. Saini RK, Keum YS. Omega-3 and omega-6 polyunsaturated fatty acids: Dietary sources, metabolism, and  
253 significance — A review. *Life Sciences*. 2018;203:255–67.
- 254 32. Devillard E, McIntosh FM, Duncan SH, Wallace RJ. Metabolism of linoleic acid by human gut bacteria:  
255 Different routes for biosynthesis of conjugated linoleic acid. *J Bacteriol*. 2007;189:2566–70.  
256 doi:10.1128/JB.01359-06.
- 257 33. Kishino S, Takeuchi M, Park SB, Hirata A, Kitamura N, Kunisawa J, et al. Polyunsaturated fatty acid saturation  
258 by gut lactic acid bacteria affecting host lipid composition. *Proc Natl Acad Sci U S A*. 2013;110:17808–13.
- 259 34. Andersen AD, Mølbak L, Thymann T, Michaelsen KF, Lauritzen L. Dietary long-chain n-3 PUFA, gut microbiota  
260 and fat mass in early postnatal piglet development-exploring a potential interplay. *Prostaglandins Leukot Essent*  
261 *Fat Acids*. 2011;85:345–51. doi:10.1016/j.plefa.2011.08.004.
- 262 35. Mackie RI, Sghir A, Gaskins HR. Developmental microbial ecology of the neonatal gastrointestinal tract. In:  
263 *American Journal of Clinical Nutrition*. American Society for Nutrition; 1999. p. 1035s-1045s.  
264 doi:10.1093/ajcn/69.5.1035s.
- 265 36. Commare CE, Tappenden KA. Development of the infant intestine: Implications for nutrition support.  
266 *Nutrition in Clinical Practice*. 2007;22:159–73. doi:10.1177/0115426507022002159.
- 267 37. Bittinger K, Zhao C, Li Y, Ford E, Friedman ES, Ni J, et al. Bacterial colonization reprograms the neonatal gut  
268 metabolome. *Nat Microbiol*. 2020;5:838–47. doi:10.1038/s41564-020-0694-0.
- 269
